# Supplementary material
Source: PubMed Central journal article supplement (PMC3898891)

Supplementary Figure S2. A

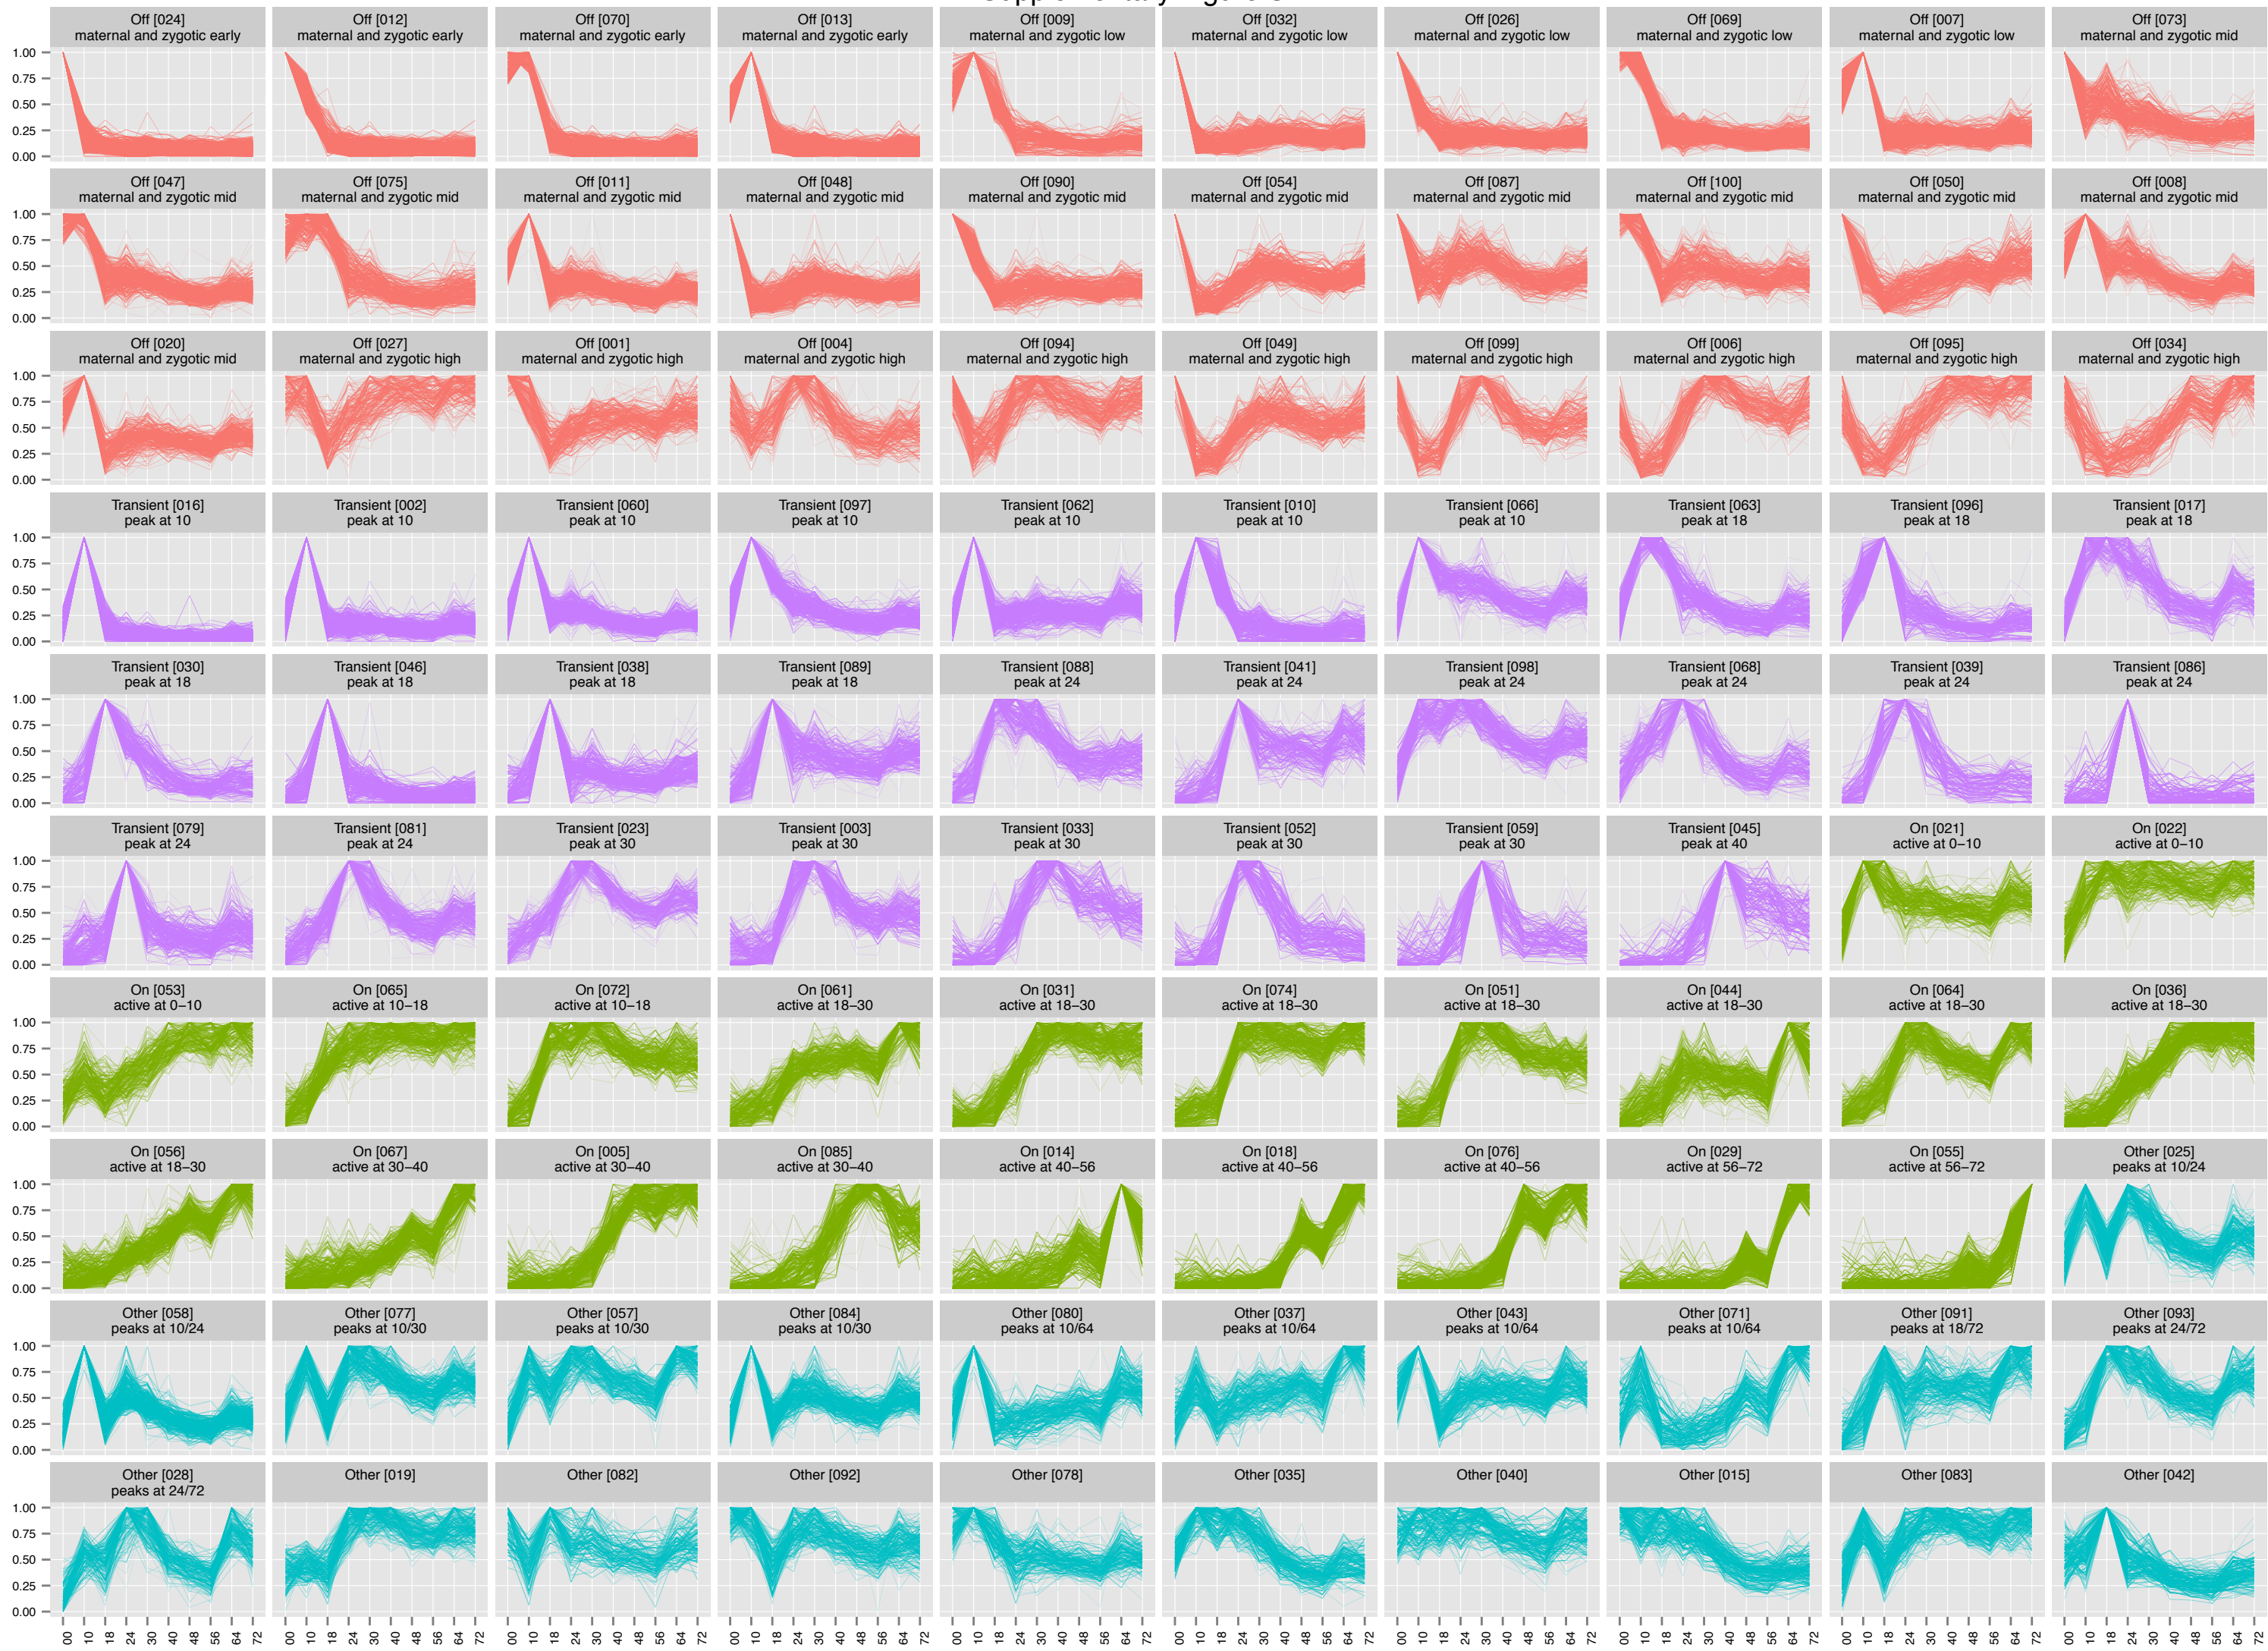

Supplementary Figure S2. B

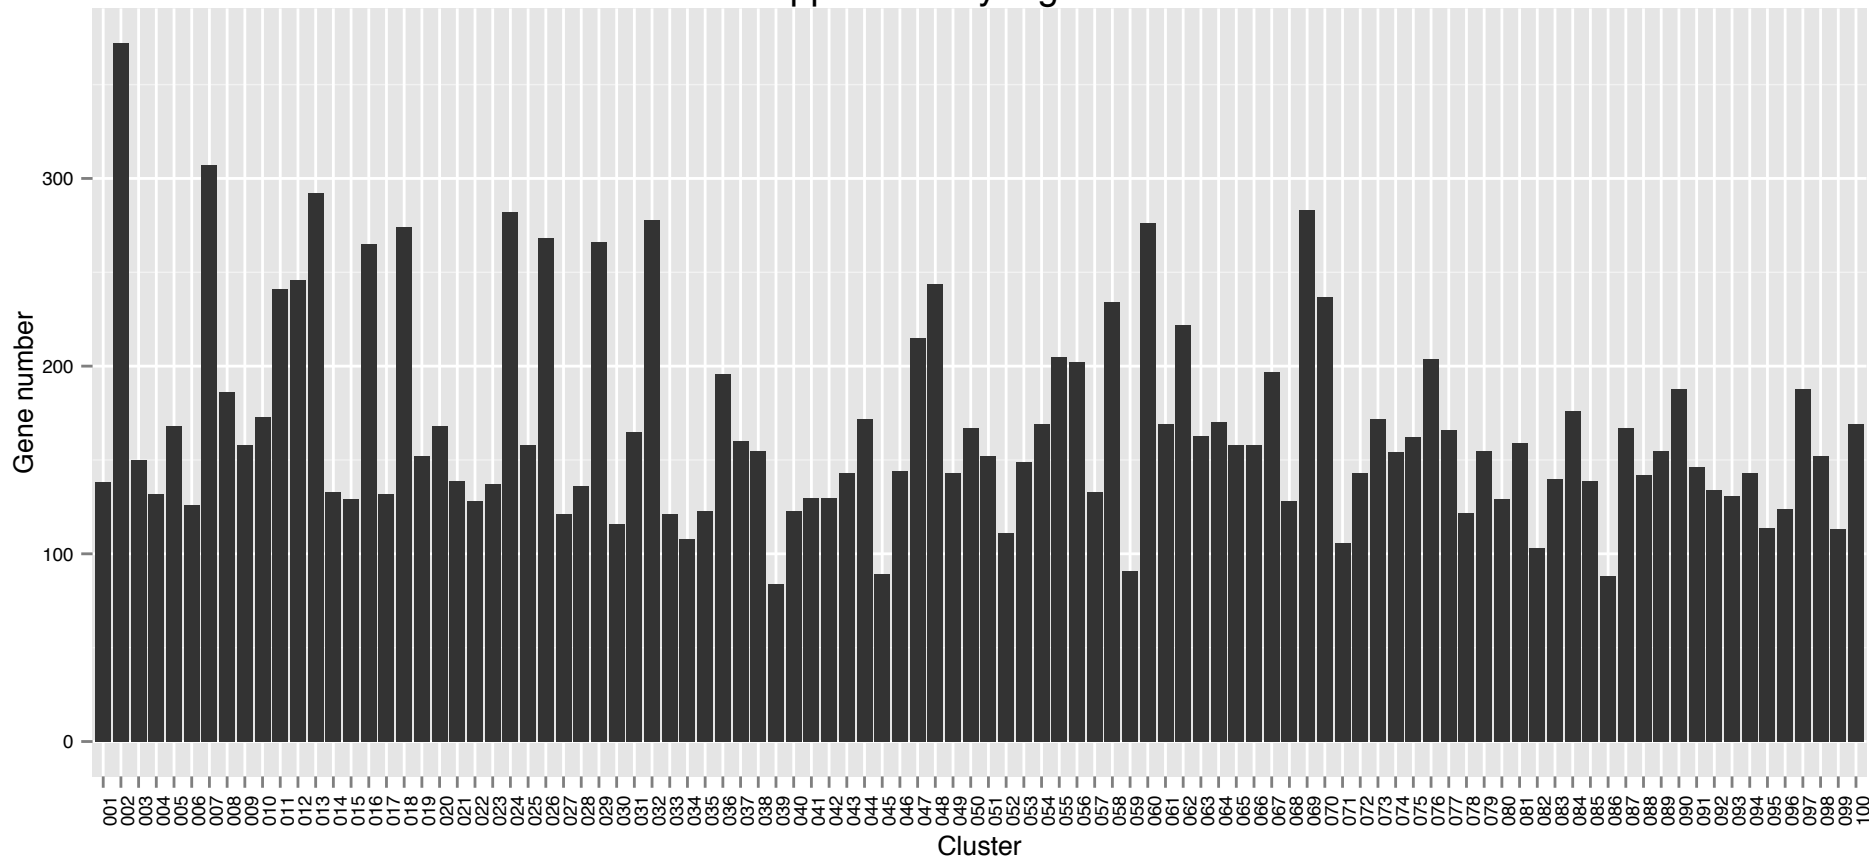

Supplementary Figure S2. C

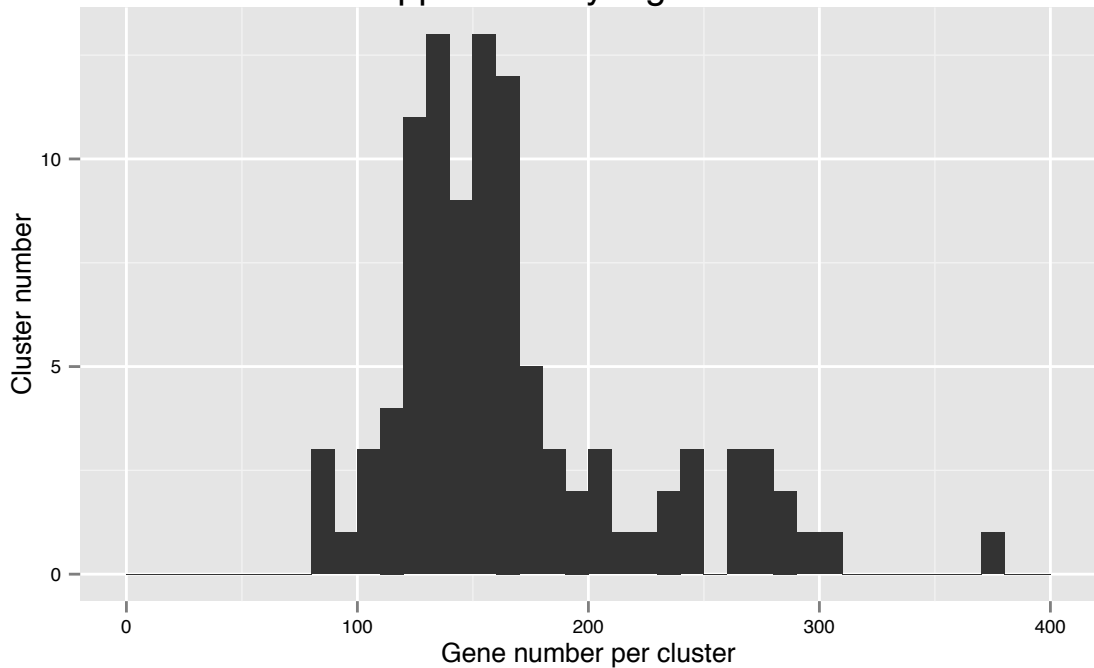

Supplement: NIHMS545106-supplement-02.pdf [file NIHMS545106-supplement-02.pdf]

# Supplementary Figure S4

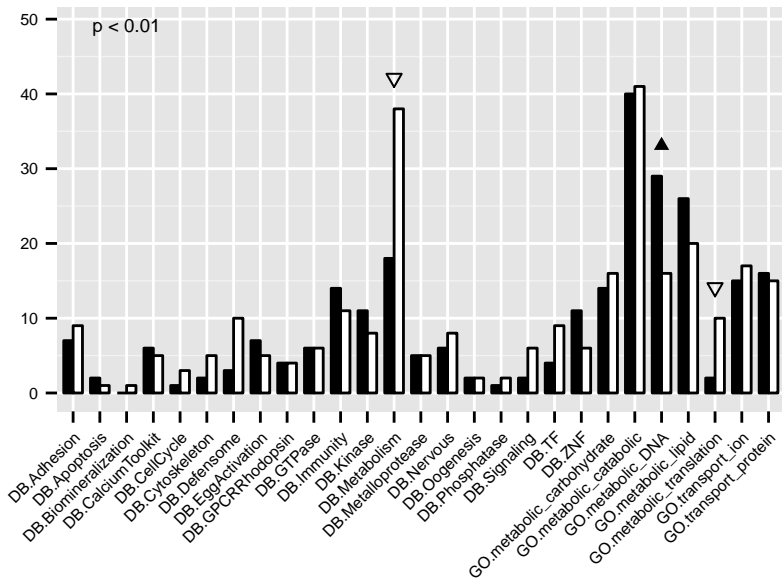

Supplement: NIHMS545106-supplement-04.pdf [file NIHMS545106-supplement-04.pdf]
